# Supplementary figures and images for: The combination of red palm oil and rooibos show anti-inflammatory effects in rats
Source: Springer Nature journal article supplement (doi:10.1186/s12950-014-0041-4), 2014-12-01

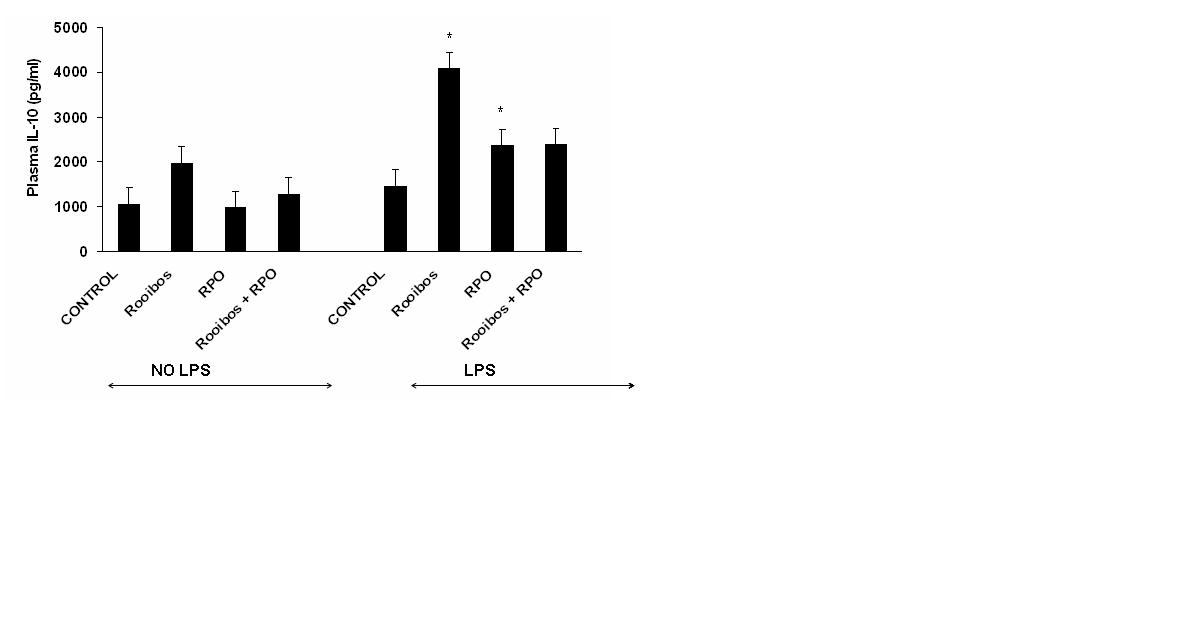


**Fig 1C: Effects of inflammation, rooibos and RPO on plasma IL-10.**

Supplement: MOESM3 [file 9763600]

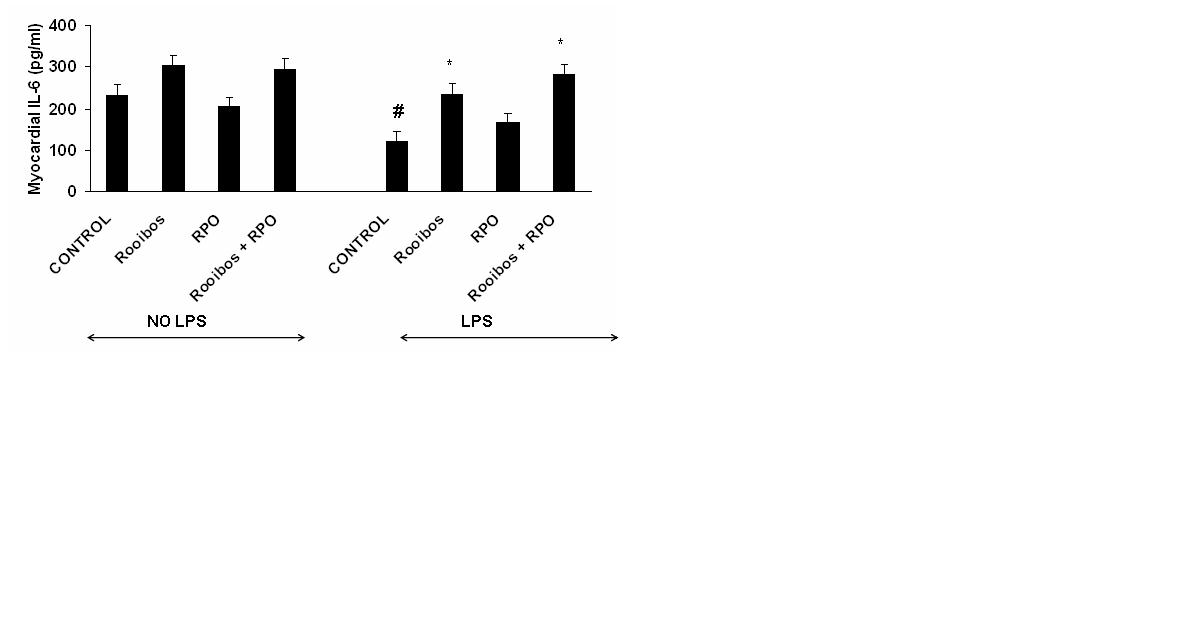


**Fig 2B: Effects of inflammation, rooibos and RPO on myocardial IL-6.**

Supplement: MOESM5 [file 9763600]
